# Supplementary material for: Mapping the drivers of uncertainty in atmospheric selenium deposition with global sensitivity analysis
Source: Copernicus journal article supplement (doi:10.5194/acp-2019-787), 2019-09-11
Supplement: Supplementary file 1 [file acp-2019-787-supplement.zip]

# Mapping the drivers of uncertainty in atmospheric selenium deposition using global sensitivity analysis

## **Supplementary Material**

Aryeh Feinberg, Moustapha Maliki, Andrea Stenke, Bruno Sudret, Thomas Peter,

Lenny H. E. Winkel

# S1 Volcanic emissions

**Table S1:** Comparison of selenium to sulfur ratios in volcanic emissions, extended from Floor and Román-Ross (2012).

| Volcano                     | Period           | Se:S ratio<br>( $\times 10^4$ ) | Reference                          |
|-----------------------------|------------------|---------------------------------|------------------------------------|
| Mount Erebus, Antarctica    | 1986–1991        | 0.46                            | Zreda-Gostynska et al. (1997)      |
|                             | 1997–2000        | 0.11                            | Wardell et al. (2008)              |
| White Island, New Zealand   | 2000–2001        | 0.06                            | Wardell et al. (2008)              |
| Merapi, Indonesia           | 1984 (Jan–Feb)   | 39                              | Symonds et al. (1987)              |
| Kurile Island, Russia       | 1990–1993        | 0.10                            | Taran et al. (1995)                |
| Kilauea, USA                | 1983 (Nov)       | 0.60                            | Finnegan et al. (1989)             |
|                             | 1983–1984        | 18                              | Olmez et al. (1986)                |
|                             | 1984–1996        | 0.64                            | Hinkley et al. (1999)              |
| St Helens, USA              | 1980 (May)       | 1.3                             | Vossler et al. (1981)              |
|                             | 1980 (September) | 3.6                             | Phelan et al. (1982)               |
| Augustine, USA              | 1976             | 3.1                             | Lepel et al. (1978)                |
| Soufrière Hills, Montserrat | 1996             | 0.72                            | Allen et al. (2000)                |
| Stromboli, Italy            | 1993–1997        | 0.84                            | Allard et al. (2000)               |
| Etna, Italy                 | 1976             | 15                              | Faivre-Pierret and Le Guern (1983) |
| (main plume)                | 1976 (June)      | 6.8                             | Buat-Menard and Arnold (1978)      |
| (lava vents)                | 1976 (June)      | 32                              | Buat-Menard and Arnold (1978)      |
| (Bocca Nuova)               | 1987 (July)      | 1.2                             | Andres et al. (1993)               |
| (SE crater)                 | 1987 (July)      | 0.24                            | Andres et al. (1993)               |
| (Total)                     | 1987 (July)      | 0.86                            | Andres et al. (1993)               |
| (Bocca Nuova)               | 2001 (3 May)     | 18                              | Aiuppa et al. (2003)               |
| (Bocca Nuova)               | 2001 (18 May)    | 8.4                             | Aiuppa et al. (2003)               |
| (Bocca Nuova)               | 2001 (5 June)    | 9.3                             | Aiuppa et al. (2003)               |
| (Bocca Nuova)               | 2001 (29 June)   | 51                              | Aiuppa et al. (2003)               |
| (Bocca Nuova)               | 2001 (12 July)   | 5.8                             | Aiuppa et al. (2003)               |
| (Lava flow)                 | 2001 (19 July)   | 15                              | Aiuppa et al. (2003)               |
| (Monti Carcazzi)            | 2001 (19 July)   | 1.1                             | Aiuppa et al. (2003)               |
| (Vent)                      | 2001 (25 July)   | 2.0                             | Aiuppa et al. (2003)               |
| (Vent)                      | 2001 (1 Aug)     | 14                              | Aiuppa et al. (2003)               |
| (Crater rims)               | 2004–2007        | 0.25                            | Calabrese et al. (2011)            |
| El Chichón, Mexico          | -                | 0.12                            | Kotra et al. (1983)                |
| Nasudake, Japan             | -                | 0.24                            | Suzuoki (1964)                     |

## S2 Dummy aerosol emission and radius relationship

**Table S2:** AEROCOM I (Dentener et al., 2006) aerosol types and the corresponding effective radius.

| Aerosol Type                                       | Effective radius ( $\mu\text{m}$ ) |
|----------------------------------------------------|------------------------------------|
| Coarse sea salt                                    | 2.50                               |
| Coarse dust                                        | 2.09                               |
| Fine mode dust                                     | 0.37                               |
| Fine mode sea salt                                 | 0.22                               |
| Biomass burning-derived particulate organic matter | 0.095                              |
| Biomass burning-derived black carbon               | 0.095                              |
| Biofuel-derived particulate organic matter         | 0.095                              |
| Biofuel-derived black carbon                       | 0.095                              |
| Ultrafine mode sea salt                            | 0.037                              |
| Fossil fuel-derived particulate organic matter     | 0.036                              |
| Fossil fuel-derived black carbon                   | 0.036                              |

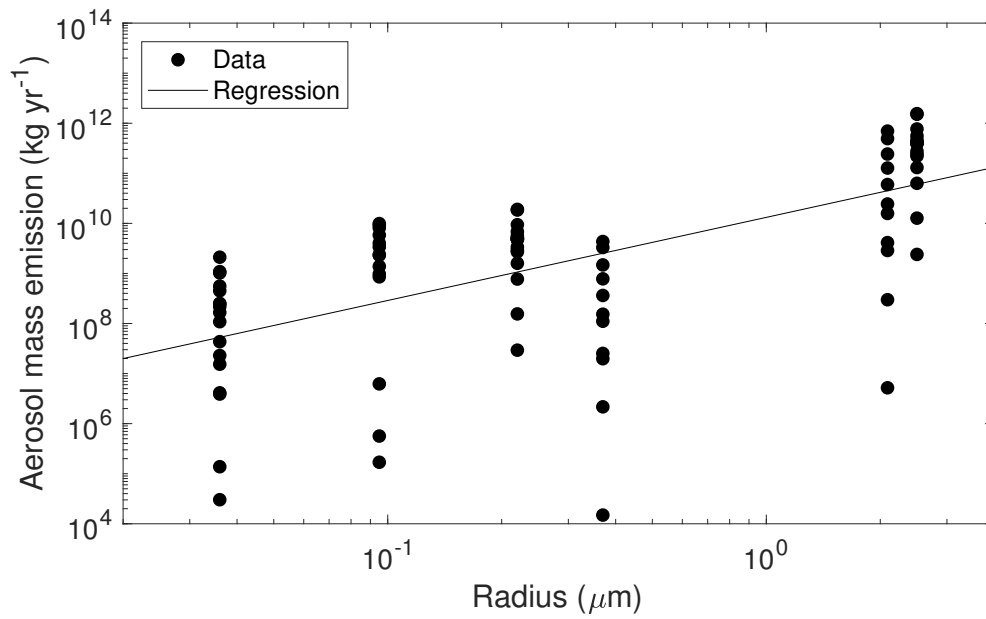

**Figure S1:** Relationship between aerosol radius and mass emissions in AEROCOM I inventory (Dentener et al., 2006). Emissions are aggregated to  $10^\circ$  latitude bands, to reflect the dummy latitude input parameter in this study.

## S3 Leave-one-out error of PCE

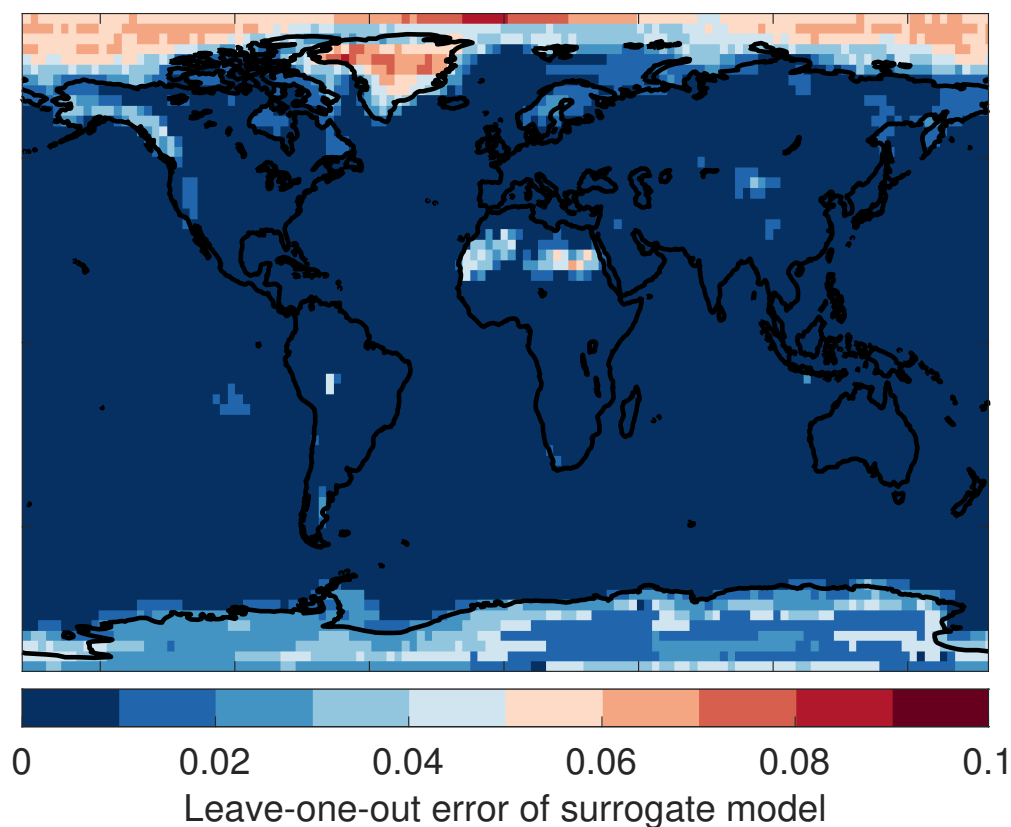

**Figure S2:** Leave-one-out error of PCE models used to represent the total Se deposition fluxes from SOCOL-AER. The colorbar is chosen to highlight values that are above 0.05, which are shown in shades of red.

## S4 References

- Aiuppa, A., Dongarrà, G., Valenza, M., Federico, C., and Pecoraino, G.: Degassing of trace volatile metals during the 2001 eruption of Etna, Washington DC American Geophysical Union Geophysical Monograph Series, 139, 41–54, URL <https://doi.org/10.1029/139GM03>, 2003.
- Allard, P., Aiuppa, A., Loyer, H., Carrot, F., Gaudry, A., Pinte, G., Michel, A., and Dongarrà, G.: Acid gas and metal emission rates during long-lived basalt degassing at Stromboli volcano, Geo-

- physical Research Letters, 27, 1207–1210, URL <https://doi.org/10.1029/1999GL008413>, 2000.
- Allen, A. G., Baxter, P. J., and Ottley, C. J.: Gas and particle emissions from Soufrière Hills Volcano, Montserrat, West Indies: characterization and health hazard assessment, *Bulletin of Volcanology*, 62, 8–19, URL <https://doi.org/10.1007/s004450050287>, 2000.
- Andres, R., Kyle, P., and Chuan, R.: Sulphur dioxide, particle and elemental emissions from Mount Etna, Italy during July 1987, *Geologische Rundschau*, 82, 687–695, URL <https://doi.org/10.1007/BF00191496>, 1993.
- Buat-Menard, P. and Arnold, M.: The heavy metal chemistry of atmospheric particulate matter emitted by Mount Etna Volcano, *Geophysical Research Letters*, 5, 245–248, URL <https://doi.org/10.1029/GL005i004p00245>, 1978.
- Calabrese, S., Aiuppa, A., Allard, P., Bagnato, E., Bellomo, S., Brusca, L., DAlessandro, W., and Parello, F.: Atmospheric sources and sinks of volcanogenic elements in a basaltic volcano (Etna, Italy), *Geochimica et Cosmochimica Acta*, 75, 7401–7425, URL <https://doi.org/10.1016/j.gca.2011.09.040>, 2011.
- Dentener, F., Kinne, S., Bond, T., Boucher, O., Cofala, J., Generoso, S., Ginoux, P., Gong, S., Hoelzemann, J., and Ito, A.: Emissions of primary aerosol and precursor gases in the years 2000 and 1750 prescribed data-sets for AeroCom, *Atmospheric Chemistry and Physics*, 6, 4321–4344, URL <https://doi.org/10.5194/acp-6-4321-2006>, 2006.
- Faivre-Pierret, R. and Le Guern, F.: Health risks linked with inhalation of volcanic gases and aerosols, 1983.
- Finnegan, D. L., Kotra, J. P., Hermann, D. M., and Zoller, W. H.: The use of 7 LiOH-impregnated filters for the collection of acidic gases and analysis by instrumental neutron activation analysis, *Bulletin of Volcanology*, 51, 83–87, URL <https://doi.org/10.1007/BF01081977>, 1989.

- Floor, G. H. and Román-Ross, G.: Selenium in volcanic environments: a review, *Applied Geochemistry*, 27, 517–531, URL <https://doi.org/10.1016/j.apgeochem.2011.11.010>, 2012.
- Hinkley, T. K., Lamothe, P. J., Wilson, S. A., Finnegan, D. L., and Gerlach, T. M.: Metal emissions from Kilauea, and a suggested revision of the estimated worldwide metal output by quiescent degassing of volcanoes, *Earth and Planetary Science Letters*, 170, 315–325, URL [https://doi.org/10.1016/S0012-821X\(99\)00103-X](https://doi.org/10.1016/S0012-821X(99)00103-X), 1999.
- Kotra, J. P., Finnegan, D. L., Zoller, W. H., Hart, M. A., and Moyers, J. L.: El Chichón: Composition of plume gases and particles, *Science*, 222, 1018–1021, URL <https://doi.org/10.1126/science.222.4627.1018>, 1983.
- Lepel, E., Stefansson, K., and Zoller, W.: The enrichment of volatile elements in the atmosphere by volcanic activity: Augustine volcano 1976, *Journal of Geophysical Research: Oceans*, 83, 6213–6220, URL <https://doi.org/10.1029/JC083iC12p06213>, 1978.
- Olmez, I., Finnegan, D., and Zoller, W.: Iridium emissions from Kilauea volcano, *Journal of Geophysical Research: Solid Earth*, 91, 653–663, URL <https://doi.org/10.1029/JB091iB01p00653>, 1986.
- Phelan, J. M., Finnegan, D. L., Ballantine, D. S., Zoller, W. H., Hart, M. A., and Moyers, J. L.: Airborne aerosol measurements in the quiescent plume of Mount St. Helens: September, 1980, *Geophysical Research Letters*, 9, 1093–1096, URL <https://doi.org/10.1029/GL009i009p01093>, 1982.
- Suzuoki, T.: A geochemical study of selenium in volcanic exhalation and sulfur deposits, *Bulletin of the Chemical Society of Japan*, 37, 1200–1206, URL <https://doi.org/10.1246/bcsj.37.1200>, 1964.
- Symonds, R. B., Rose, W. I., Reed, M. H., Lichte, F. E., and Finnegan, D. L.: Volatilization, transport and sublimation of metallic and non-metallic elements in high temperature gases at

- Merapi Volcano, Indonesia, *Geochimica et Cosmochimica Acta*, 51, 2083–2101, URL [https://doi.org/10.1016/0016-7037\(87\)90258-4](https://doi.org/10.1016/0016-7037(87)90258-4), 1987.
- Taran, Y. A., Hedenquist, J., Korzhinsky, M., Tkachenko, S., and Shmulovich, K.: Geochemistry of magmatic gases from Kudryavy volcano, Iturup, Kuril Islands, *Geochimica et Cosmochimica Acta*, 59, 1749–1761, URL [https://doi.org/10.1016/0016-7037\(95\)00079-F](https://doi.org/10.1016/0016-7037(95)00079-F), 1995.
- Vossler, T., Anderson, D. L., Aras, N. K., Phelan, J. M., and Zoller, W. H.: Trace element composition of the Mount St. Helens plume: Stratospheric samples from the 18 May eruption, *Science*, 211, 827–830, URL <https://doi.org/10.1126/science.211.4484.827>, 1981.
- Wardell, L., Kyle, P., and Counce, D.: Volcanic emissions of metals and halogens from White Island (New Zealand) and Erebus volcano (Antarctica) determined with chemical traps, *Journal of Volcanology and Geothermal Research*, 177, 734–742, URL <https://doi.org/10.1016/j.jvolgeores.2007.07.007>, 2008.
- Zreda-Gostynska, G., Kyle, P. R., Finnegan, D., and Prestbo, K. M.: Volcanic gas emissions from Mount Erebus and their impact on the Antarctic environment, *Journal of Geophysical Research: Solid Earth*, 102, 15 039–15 055, URL <https://doi.org/10.1029/97JB00155>, 1997.
